# Supplementary material for: Production of Hydroxy Fatty Acids, Precursors of γ-Hexalactone, Contributes to the Characteristic Sweet Aroma of Beef
Source: MDPI journal article supplement (doi:10.3390/metabo12040332), 2022-04-06

**Figure S1.** Top 10 metabolites in beef tallow prepared from muscle tissue.

The metabolites were quantified using gas chromatography-mass spectrometry.

The water-soluble fraction was extracted from beef tallow and subjected to GC/MS analysis (GCMS-QP2010 Ultra, Shimadzu Corporation, Kyoto, Japan) using conventional methods [1]. Quantification using the peak area ratio (peak height ratio) of the internal standard (5  $\mu$ g sinapic acid). Data represent the mean  $\pm$  Standard deviation (n = 3).

| No. | Metabolites         | Concentration<br>( $\mu$ g/mL) | Standard<br>deviation |
|-----|---------------------|--------------------------------|-----------------------|
| 1   | Glycerol            | 39.8                           | $\pm$ 3.11            |
| 2   | Pyrophosphoric acid | 19.3                           | $\pm$ 1.84            |
| 3   | Lactic acid         | 16.2                           | $\pm$ 1.31            |
| 4   | Oxalic acid         | 11.8                           | $\pm$ 1.33            |
| 5   | Inositol            | 9.4                            | $\pm$ 0.88            |
| 6   | Glycine             | 9.2                            | $\pm$ 0.66            |
| 7   | Urea                | 7.5                            | $\pm$ 0.50            |
| 8   | Pyroglutamic acid   | 3.6                            | $\pm$ 0.42            |
| 9   | Alanine             | 3.4                            | $\pm$ 0.33            |
| 10  | Glutamic acid       | 3.1                            | $\pm$ 0.51            |

1. Ueda, S.; Iwamoto, E.; Kato, Y.; Shinohara, M.; Shirai, Y.; Yamanoue, M. Comparative metabolomics of Japanese Black cattle beef and other meats using gas chromatography-mass spectrometry. *Biosci Biotechnol Biochem* **2019**, *83*, 137-147, doi:10.1080/09168451.2018.1528139.

**Figure S2.** Composition of saturated aliphatic acids volatilized by dynamic headspace.

The composition of saturated aliphatic acids was detected using a gas chromatograph-mass spectrometer. Beef tallow was heated in dynamic headspace and analyzed by thermal desorption unit-gas chromatography-mass spectrometry using an Agilent 7890B gas chromatograph-5977B mass spectrometer equipped with a DB-WAX capillary column.

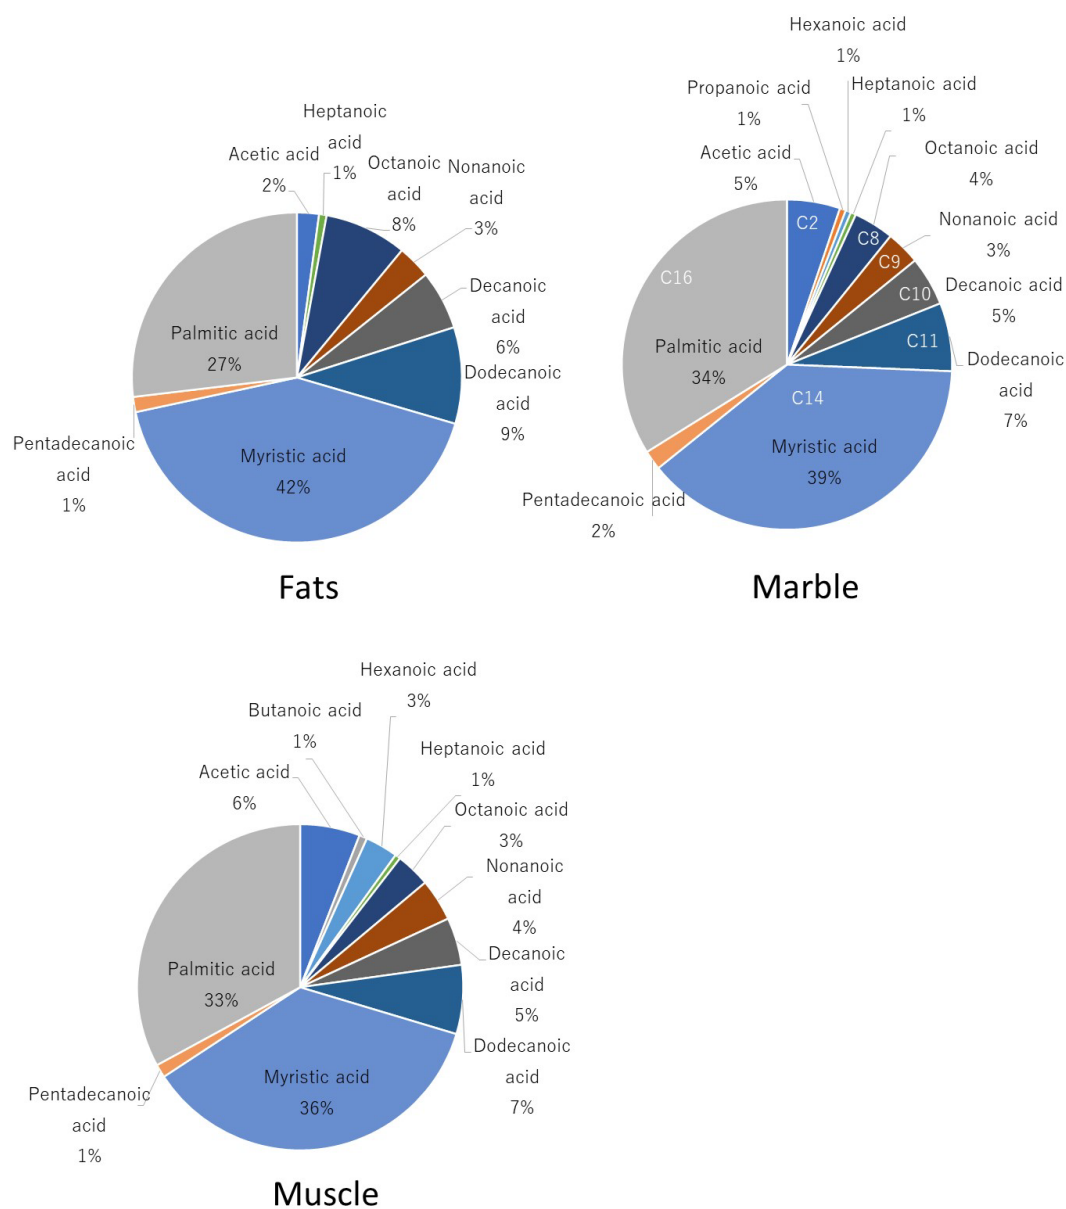

**Figure S3.** Composition of saturated aldehydes volatilized by dynamic headspace.

The composition of saturated aldehydes was detected using a gas chromatograph-mass spectrometer. Beef tallow was heated in dynamic headspace and analyzed by thermal desorption unit-gas chromatography-mass spectrometry using an Agilent 7890B gas chromatograph-5977B mass spectrometer equipped with a DB-WAX capillary column.

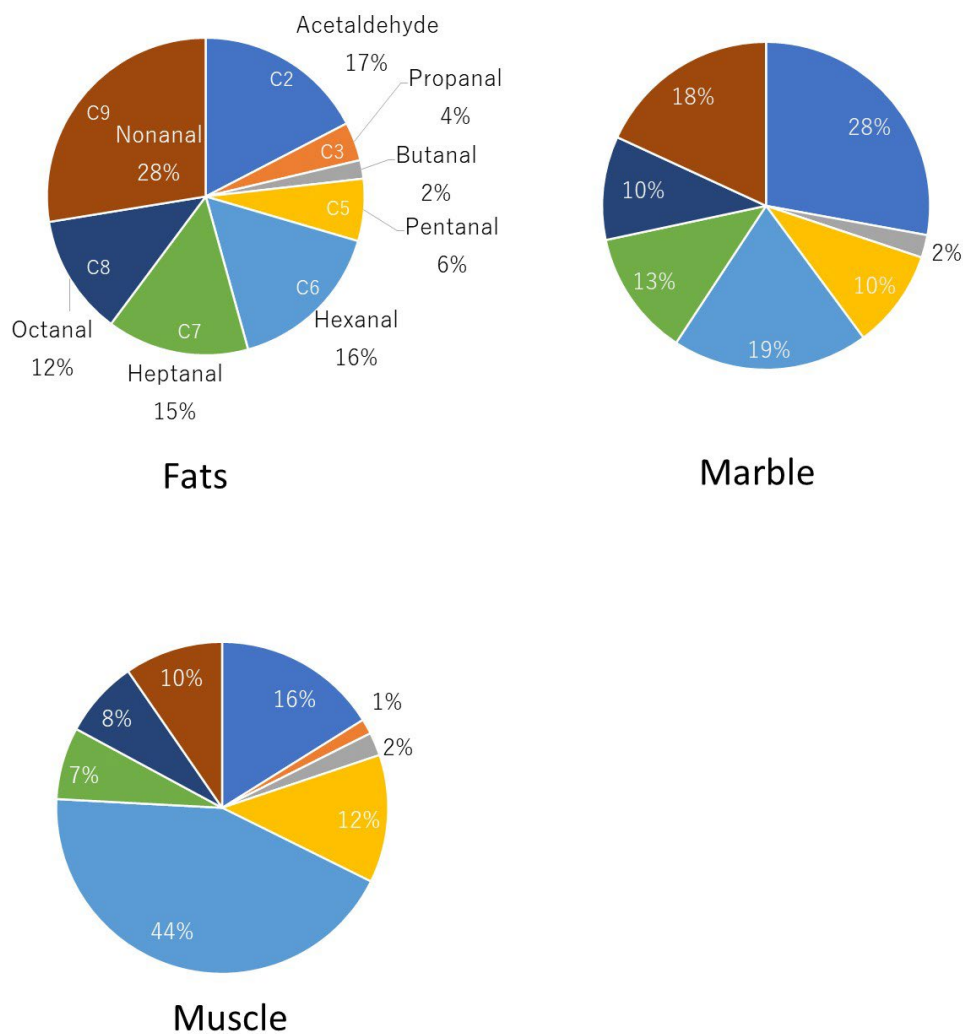

Supplement: s1 [file s1]
